# Supplementary material for: Identification of Bufavirus-1 and Bufavirus-3 in Feces of Patients with Acute Diarrhea, China
Source: PubMed Central journal article supplement (PMC4541159; doi:10.1038/srep13272), 2015-08-19
Supplement: srep13272-s1.pdf [file srep13272-s1.pdf]

# Identification of Bufavirus-1 and Bufavirus-3 in Feces of Patients with Acute Diarrhea, China

Dou-Dou Huang<sup>1,2#</sup>, Wei Wang<sup>1,2#</sup>, Qing-Bin Lu<sup>3</sup>, Jin Zhao<sup>2</sup>, Chen-Tao Guo<sup>1,2</sup>, Hong-Yu Wang<sup>1,2</sup>, Xiao-Ai Zhang<sup>2</sup>, Yi-Gang Tong<sup>2</sup>, Wei Liu<sup>1,2\*</sup> and Wu-Chun Cao<sup>2\*</sup>

## **Affiliations:**

<sup>1</sup> Graduate School of Anhui Medical University, 230032, Hefei, P. R. China;

<sup>2</sup> State Key Laboratory of Pathogen and Biosecurity, Beijing Institute of Microbiology and Epidemiology, 100071, Beijing, P. R. China;

<sup>3</sup> School of Public Health, Peking University, 100191, Beijing, P. R. China;

**#These authors contributed equally to the paper.**

\*Correspondence authors:

Wu-Chun Cao M.D., Ph.D., State Key Laboratory of Pathogen and Biosecurity, Beijing Institute of Microbiology and Epidemiology, 20 Dong-Da Street, Fengtai District, Beijing 100071, P. R. China., Tel (+86)10-63896082, Fax (+86)10-63896082, E-mail: [caowc@bmi.ac.cn](mailto:caowc@bmi.ac.cn)

Wei Liu M.D., State Key Laboratory of Pathogen and Biosecurity, Beijing Institute of Microbiology and Epidemiology, 20 Dong-Da Street, Fengtai District, Beijing 100071, P. R. China., Tel (+86)10-63896082, Fax (+86)10-63896082, E-mail: [lwbime@163.com](mailto:lwbime@163.com)

**Supplemental Table Primer Sequences.**

| Primer_Name | Primer_sequence       | Amplification_length |
|-------------|-----------------------|----------------------|
| 1-F         | ATTCATTACCATGGCTCT    | 209bp                |
| 1-R         | TGTTACTCACAGTTTGTGG   |                      |
| 2-F         | ATCACCTGGAAAGACTACAG  | 263bp                |
| 2-R         | CACTGCAGACTAGTACATGG  |                      |
| 3-F         | TTGGGAAAAGACACAGGCTT  | 194bp                |
| 3-R         | TTAGCACATCAACCCAGTCA  |                      |
| 4-F         | AGGCCTTACTACAACAAACC  | 293bp                |
| 4-R         | GTTGTGGTTGGATTGTGGT   |                      |
| 5-F         | CTTGGTTGCTAGGCACTGTC  | 281bp                |
| 5-R         | TTGACTAGGTCATAGGCAC   |                      |
| 6-F         | CCTGCAGTGTCTTAGAC     | 269bp                |
| 6-R         | TAGCAGCCTGTGTTACCAAC  |                      |
| 7-F         | TACTATGTGGCCCTGCAAGC  | 249bp                |
| 7-R         | GGTTGTCATGACAACTGGAG  |                      |
| 8-F         | GTGGCCAAGCAATCAGACTT  | 294bp                |
| 8-R         | CCAATTTTCGCCCATGTAG   |                      |
| 9-F         | GGTCATACATAGACAGATGG  | 307bp                |
| 9-R         | GTTGGCCATATCCTGTTGCC  |                      |
| 10-F        | AGAAACCGAGCGAGCACTAG  | 308bp                |
| 10-R        | TTTGCTTCTGCTCTWGGAG   |                      |
| 11-F        | CCTACTTCAACTGGAACAGC  | 269bp                |
| 11-R        | GCTGAAGTCTTGATTGAAGG  |                      |
| 12-F        | CCRCCTGGATACTACTACCT  | 284bp                |
| 12-R        | GGCTGTATTCTGGTTCGGTG  |                      |
| 13-F        | GCACTAGCTCCTGAACTGGC  | 312bp                |
| 13-R        | GAGTGACAGACGATAGTAAC  |                      |
| 14-F        | GGCACAGCACTGGYAATTAC  | 316bp                |
| 14-R        | TGTCTAGTGTGTTGGTCGAGG |                      |
| 15-F        | GATGAACCCAGCAGACTTCC  | 374bp                |
| 15-R        | TGTTGTGGTTTCAATTGGAG  |                      |
| 16-F        | CATGTCAACTTCTGGAACAC  | 426bp                |
| 16-R        | CATGGTGCTTGGCTGAATGG  |                      |
| 17-F        | CCACATAGGATACTCATGGC  | 346bp                |
| 17-R        | CCCCATGGGTATTGTATTCC  |                      |
| 18-F        | TCTGGACACAAGACTACCAC  | 281bp                |
| 18-R        | CTTGGTAGTCTTAGTTTGCC  |                      |
| 19-F        | AAACCTACAAACAGATGGAC  | 397bp                |
| 19-R        | YATTGTGAATAGCAGCACCT  |                      |
| 20-F        | ATGCCTGGAAGATGTATGCC  | 397bp                |
| 20-R        | GTACTATCTGTTGGTTGGT   |                      |
